# Supplementary material for: Constructing an image vision transformer for recognizing hand gestures using surface electromyography signals
Source: Research Square preprint supplement (doi:10.21203/rs.3.rs-3021836/v1), 2023-06-15
Supplement: Supplementary file 1 [file f02b5dfc5faa3fa1af56a8cd.docx]

**Supplementary table S1: Summary of the time domain features**

There are more than 27-time domain features, supplementary table S1 shows a summary of some of these features, and formulas are calculated after dividing the signal x into windows of length L, xi,k represents the kth element of the ith window.

Supplementary table S1 Summary of the time domain features

| **Feature** | **Formula** | **Explanation** |
| --- | --- | --- |
| Mean Absolute Value (MAV) (1) | *MAV (xi) =* | The moving average of the signal. |
| Waveform length (WL) (2) | *WL (xi) =* | Offers a simple characterization of the amplitude, duration and frequency of the signal |
| Zero Crossing (ZC) (3) | *{} or {} and* | Counts the frequencies at which the signal passes through zero (a threshold is used to avoid noise). |
| Variance (VAR) (4) |  | An index to the power of the signal. |
| Root Mean Square (RMS) |  | Also known as the quadratic Mean. Related to the Standard deviation when the mean of the signal =0. |
| Average Amplitude Change (AAC) (3) |  | Shows the mean value by which the amplitude of the signal changes |
| Slope sign change (SSC)  (3) |  | Measures the frequency at which the signal changes the slope sign (derivative). |
| Skewness (SKEW)  (3) | *SKEW =*  *Where is the standard deviation* | Measures the asymmetry of the distribution. |
| Autoregressive coefficient (AR) (3) | *Where p is the model order and is the coefficient of the model and is the residual noise* | Aims to predict the future values of the signal based on the weighted average of the previous data. It shows each sample point as a linear combination of previous samples and an error. |
| Integrated EMG (IEMG) |  | Returns the absolute sum of the segment |
| Myopulse Percentage Rate (MYOP) |  | Shows the mean absolute value of the segment of the windows that is larger than an amplitude threshold value |
| Temporal Moment (TM) |  | The 1st order is the MAV, and the 2nd order is the variance, thus it usually starts from the 3rd order. It is a statistical analysis technique that can be also used as a feature |
| V -order (VO) |  | According to (Phinyomark, et al., 2012).), it gives an insight into the force of the muscle contraction. |
| Mean Absolute Derivative (MAD) |  | Shows the distance between each sample of the window and the mean. |

## Supplementary table S2: Summary of the Frequency domain features

Supplementary table S2, shows a summary from (59) of some of these features, formulas are calculated after dividing the signal x with frequency f and power spectrum p into windows of length L, xi,j represents the jth element of the ith window.

Supplementary table S2: Summary of the Frequency domain features

| **Feature** | **Formula** | **Explanation** |
| --- | --- | --- |
| Mean Frequency (MNF) |  | The average frequency. |
| Median frequency (MDF) |  | The frequency divides the spectrum into two regions that are equal in amplitude. |
| Mean power frequency (MNP) |  | The average power of the power spectrum. |
| Peak frequency (PF) | PKF = max () | The frequency corresponds to the highest power. |
| Total power (TTP) |  | A summation of the sEMG power spectrum. |
| Frequency ratio (FR) | where ULC and LLC are the upper- and lower-cutoff frequency of the low-frequency band and UHC and LHC are the upper- and lower-cutoff frequency of the high-frequency band, respectively | The ratio between the highest and lowest frequency components of the sEMG signals. used to distinguish between the contraction and relaxation of the muscles. |
| Power spectrum ratio (PSR) | Where is a feature value of the FPK and n is the limit for integration | The ratio between the energy (nearly the maximum value of the sEMG power spectrum) and the energy P which is the whole energy of the sEMG power spectrum. |

## Supplementary table S3: Summary of the time-frequency domain features (5):

Some of the time-frequency features are found in Supplementary table S3.

Supplementary table S3: Summary of the time-frequency domain features

| **Feature** | **Formula** | **Explanation** |
| --- | --- | --- |
| Continuous Wavelet transform (CWT) | where ***a*** is a scale parameter and ***b*** is a translation parameter | Uses every possible wavelet in a range of locations and scales through the changing parameters and b. |
| Discrete Wavelet Transformation (DWT) | And,  Where ***m*** is the dilation parameter, ***n*** is the translation parameter and is the step parameter | Uses defined wavelets in a range of locations and scales. |

**References**

1. Abbaspour S, Lindén M, Gholamhosseini H, Naber A, Ortiz-Catalan M. Evaluation of surface EMG-based recognition algorithms for decoding hand movements. Med Biol Eng Comput [Internet]. 2020 Jan 1 [cited 2023 May 19];58(1):83. Available from: /pmc/articles/PMC6946760/

2. Qin P, Shi X. Evaluation of Feature Extraction and Classification for Lower Limb Motion Based on sEMG Signal. Entropy 2020, Vol 22, Page 852 [Internet]. 2020 Jul 31 [cited 2023 May 19];22(8):852. Available from: https://www.mdpi.com/1099-4300/22/8/852/htm

3. Côté-Allard U, Fall CL, Drouin A, Campeau-Lecours A, Gosselin C, Glette K, et al. Deep Learning for Electromyographic Hand Gesture Signal Classification Using Transfer Learning. IEEE Transactions on Neural Systems and Rehabilitation Engineering. 2019 Apr 1;27(4):760–71.

4. Li W, Shi P, Yu H. Gesture Recognition Using Surface Electromyography and Deep Learning for Prostheses Hand: State-of-the-Art, Challenges, and Future. Front Neurosci. 2021 Apr 26;15:259.

5. Tanwar S, Nayyar A, Rameshwar R. Machine Learning in Signal Processing: Applications, Challenges, and The Road Ahead [Internet]. CRC Press; Chapman & Hall; 2022 [cited 2023 May 19]. Available from: https://www.routledge.com/Machine-Learning-in-Signal-Processing-Applications-Challenges-and-the/Tanwar-Nayyar-Rameshwar/p/book/9780367618902
